# Supplementary material for: Gum Arabic/Gelatin and Water-Soluble Soy Polysaccharides/Gelatin Blend Films as Carriers of Astaxanthin—A Comparative Study of the Kinetics of Release and Antioxidant Properties
Source: PubMed Central journal article supplement (PMC8036643; doi:10.3390/polym13071062), 2021-03-28
Supplement: polymers-13-01062-s001.pdf [file polymers-13-01062-s001.pdf]

**Table 1.** Mathematical models used to describe the dissolution curves [24].

| Model.                                           | Equation                                                                                      | Parameters                    |
|--------------------------------------------------|-----------------------------------------------------------------------------------------------|-------------------------------|
| Zero-order (Z-O)                                 | $F = k_0 \cdot t$                                                                             | $k_0$                         |
| Zero-order with $T_{lag}$ (Z-O $T_{lag}$ )       | $F = k_0 \cdot (t - T_{lag})$                                                                 | $k_0, T_{lag}$                |
| First order with $F_{max}$ (F-O $F_{max}$ )      | $F = F_{max} \cdot (1 - e^{-k_1 \cdot t})$                                                    | $k_1, F_{max}$                |
| Korsmeyer–Peppas with $T_{lag}$ (K-P $T_{lag}$ ) | $F = k_{KP} \cdot (t - T_{lag})^n$                                                            | $k_{KP}, n, T_{lag}$          |
| Hopfenberg (Ho)                                  | $F = 100 \cdot [1 - (1 - k_{HB} \cdot t)^n]$                                                  | $k_{HB}, n$                   |
| Makoid–Banakar with $T_{lag}$ (M-B $T_{lag}$ )   | $F = k_{MB} \cdot (t - T_{lag})^n \cdot \text{Exp}[-k \cdot (t - T_{lag})]$                   | $k_{MB}, n, k, T_{lag}$       |
| Peppas–Sahlin 1 with $T_{lag}$ (P-S $T_{lag}$ )  | $F = k_1 \cdot (t - T_{lag})^m + k_2 \cdot (t - T_{lag})^{2m}$                                | $k_1, k_2, m, T_{lag}$        |
| Logistic 2 (Lo 2)                                | $F = F_{max} \frac{[e^{\alpha + \beta \cdot \log(t)}]}{1 + e^{\alpha + \beta \cdot \log(t)}}$ | $\alpha, \beta, F_{max}$      |
| Gompertz 4 (Go 4)                                | $F = F_{max} \cdot e^{-\beta \cdot e^{-k \cdot t}}$                                           | $k, \beta, F_{max}$           |
| Probit 2 (Pr 2)                                  | $F = F_{max} \cdot \Phi[\alpha + \beta \cdot \log(t)]$                                        | $\alpha, \beta, F_{max}$      |
| Weibull with $F_{max}$ (Wb $F_{max}$ )           | $F = F_{max} \cdot \left[ 1 - e^{-\frac{(t - T_i)^\beta}{\alpha}} \right]$                    | $\alpha, \beta, T_i, F_{max}$ |

$F$  is the fraction (%) of drug released in time  $t$ .

$k_0$  is the Zero-order release constant

$T_{lag}$  is the lag time prior to drug release

$k_1$  is the First-order release constant

$F_{max}$  is the maximum fraction of the drug released at infinite time

$k_{KP}$  is the release constant incorporating structural and geometric characteristics of the drug-dosage form;  $n$  is the diffusional exponent indicating the drug-release mechanism

$k_{HB}$  is the combined constant in Hopfenberg model,  $k_{HB} = k_0 / (C_0 \times a_0)$ , where  $k_0$  is the erosion rate constant,  $C_0$  is the initial concentration of drug in the matrix, and  $a_0$  is the initial radius for a sphere or cylinder or the half thickness for a slab;  $n$  is 1, 2, and 3 for a slab, cylinder, and sphere, respectively

$k_{MB}$ ,  $n$ , and  $k$  are empirical parameters in Makoid–Banakar model ( $k_{MB}$ ,  $n$ ,  $k > 0$ )

$k_1$  is the constant related to the Fickian kinetics;  $k_2$  is the constant related to Case-II relaxation kinetics;  $m$  is the diffusional exponent for a device of any geometric shape which inhibits controlled release

$\alpha$  is the scale factor in Logistic 1 and 2 models;  $\beta$  is the shape factor in Logistic 1 and 2 models

$\beta$  is the scale factor in Gompertz 4 model;  $k$  is the shape factor in Gompertz 4 model

$\Phi$  is the standard normal distribution;  $\alpha$  is the scale factor in Probit model;  $\beta$  is the shape factor in Probit model

$\alpha$  is the scale parameter which defines the time scale of the process;  $\beta$  is the shape parameter which characterizes the curve as either exponential ( $\beta = 1$ ; case 1), sigmoid, S-shaped, with upward curvature followed by a turning point ( $\beta > 1$ ; case 2), or parabolic, with a higher initial slope and after that consistent with the exponential ( $\beta < 1$ ; case 3)

$T_i$  is the location parameter which represents the lag time before the onset of the dissolution or release process and in most cases will be near zero

**Table 2.** Comparison of AIC values obtained from fitting experimental data to the different release models.

| Film         | AST (%) | F-O $F_{max}$ | Lo 2   | Go 4   | Pr 2   | Z-O    | Z-O $T_{lag}$ | K-P $T_{lag}$ | Ho      | M-B $T_{lag}$ | P-S $T_{lag}$ | Best fit      |
|--------------|---------|---------------|--------|--------|--------|--------|---------------|---------------|---------|---------------|---------------|---------------|
| GAR75/GEL25  | 0.25    | 175.26        | 86.82  | 87.41  | 89.11  | 222.56 | 222.56        | 137.44        | 129.030 | 139.039       | 138.932       | Lo 2          |
|              | 0.5     | 168.83        | 138.28 | 139.56 | 139.18 | 215.26 | 215.26        | 125.69        | 174.424 | 127.434       | 127.607       | K-P $T_{lag}$ |
|              | 1       | 180.33        | 129.37 | 127.75 | 127.47 | 216.02 | 216.02        | 151.965       | 154.789 | 181.196       | 143.119       | Pr 2          |
| WSSP75/GEL25 | 0.25    | 149.35        | 143.80 | 154.43 | 141.47 | 176.89 | 176.89        | 133.377       | 146.982 | 133.939       | 135.041       | K-P $T_{lag}$ |
|              | 0.5     | 154.90        | 126.74 | 124.75 | 127.73 | 178.98 | 178.98        | 150.131       | 155.017 | 127.992       | 130.596       | Go 4          |
|              | 1       | 168.53        | 142.45 | 141.21 | 144.66 | 160.14 | 160.14        | 150.706       | 137.260 | 139.295       | 152.451       | Ho            |

**Table 3.** Parameters obtained from fitting experimental data to the release models with  $F_{max}$  parameter.

| Film        | AST (%) | F-O $F_{max}$ |           | Lo 2     |         | Go 4      |        |         | Pr 2      |          |         |           |
|-------------|---------|---------------|-----------|----------|---------|-----------|--------|---------|-----------|----------|---------|-----------|
|             |         | $k_t$ (1/min) | $F_{max}$ | $\alpha$ | $\beta$ | $F_{max}$ | $k$    | $\beta$ | $F_{max}$ | $\alpha$ | $\beta$ | $F_{max}$ |
| CMC75/GEL25 | 0.25    | 13.286        | 100.539   | 4.860    | 3.776   | 101.227   | 21.933 | 2.569   | 100.288   | 2.927    | 2.258   | 100.750   |
|             | 0.5     | 15.049        | 97.169    | 4.129    | 2.991   | 98.744    | 22.563 | 2.233   | 96.934    | 2.535    | 1.826   | 97.994    |
|             | 1       | 10.310        | 100.207   | 4.108    | 3.471   | 101.475   | 17.391 | 2.511   | 99.841    | 2.473    | 2.072   | 100.817   |
| OSA75/GEL25 | 0.25    | 1.938         | 64.609    | 3.486    | 8.218   | 62.397    | 6.621  | 8.717   | 62.033    | 2.051    | 4.832   | 62.219    |
|             | 0.5     | 2.970         | 49.637    | 5.404    | 7.753   | 48.157    | 13.556 | 10.120  | 47.818    | 3.263    | 4.677   | 48.025    |
|             | 1       | 2.392         | 36.161    | 7.706    | 14.278  | 34.698    | 14.686 | 45.899  | 34.682    | 4.449    | 8.179   | 34.667    |

**Table 4.** Kinetic parameters obtained from modeling without  $F_{max}$  parameter. .

| Film            | AST (%) | Z-O        |            |            | Ho       |              | K-P $T_{lag}$ |       |           | M-B $T_{lag}$ |       |       | P-S $T_{lag}$ |         |             |       |           |
|-----------------|---------|------------|------------|------------|----------|--------------|---------------|-------|-----------|---------------|-------|-------|---------------|---------|-------------|-------|-----------|
|                 |         | $k_0$      | $k_0$      | $T_{lag}$  | $k_{HB}$ | $n$          | $k_{KP}$      | $n$   | $T_{lag}$ | $k_{MB}$      | $n$   | $k$   | $T_{lag}$     | $k_1$   | $k_2$       | $m$   | $T_{lag}$ |
| CMC75/GEL<br>25 | 0.25    | 37.66<br>2 | 21.65<br>6 | -1.86<br>4 | 4.379    | 2.354        | 97.282        | 0.051 | 0.050     | 114.028       | 0.173 | 0.107 | 0.017         | 184.585 | -82.13<br>0 | 0.264 | 0.017     |
|                 | 0.5     | 35.92<br>4 | 21.21<br>6 | -1.75<br>0 | 0.006    | 2236.48<br>0 | 93.319        | 0.082 | 0.017     | 106.377       | 0.148 | 0.080 | 0.017         | 174.082 | -75.80<br>5 | 0.238 | 0.017     |
|                 | 1       | 35.71<br>3 | 26.42<br>1 | -0.88<br>9 | 1.092    | 8.920        | 95.543        | 0.079 | 0.050     | 115.907       | 0.225 | 0.130 | 0.017         | 175.899 | -74.31<br>8 | 0.307 | 0.016     |
| OSA75/GEL<br>25 | 0.25    | 30.91<br>2 | 28.36<br>7 | -0.22<br>7 | 0.000    | 5041.12<br>1 | 59.327        | 0.067 | 0.330     | 69.974        | 0.215 | 0.120 | 0.319         | 106.128 | -44.16<br>9 | 0.310 | 0.313     |
|                 | 0.5     | 25.51<br>7 | 23.35<br>3 | -0.23<br>4 | 0.000    | 2046.78<br>5 | 45.349        | 0.077 | 0.170     | 58.819        | 0.396 | 0.203 | 0.091         | 68.554  | -21.62<br>2 | 0.103 | 0.170     |
|                 | 1       | 24.11<br>1 | 27.09<br>0 | 0.277      | 0.000    | 1773.11<br>9 | 34.396        | 0.026 | 0.330     | 35.823        | 0.060 | 0.029 | 0.328         | 63.175  | -28.35<br>0 | 0.149 | 0.320     |
